# Supplementary material for: Exploring the putative role of PRDM1 and PRDM2 transcripts as mediators of T lymphocyte activation
Source: Springer Nature journal article supplement (doi:10.1186/s12967-023-04066-x), 2023-03-24
Supplement: MOESM1 [file 24672354]

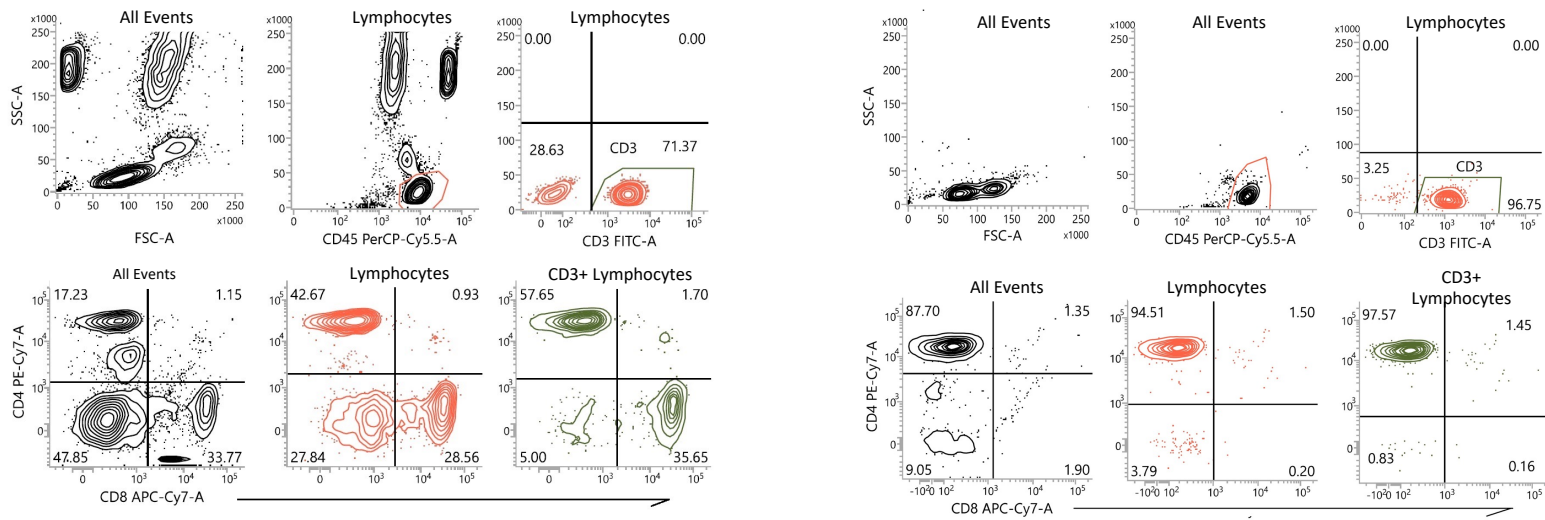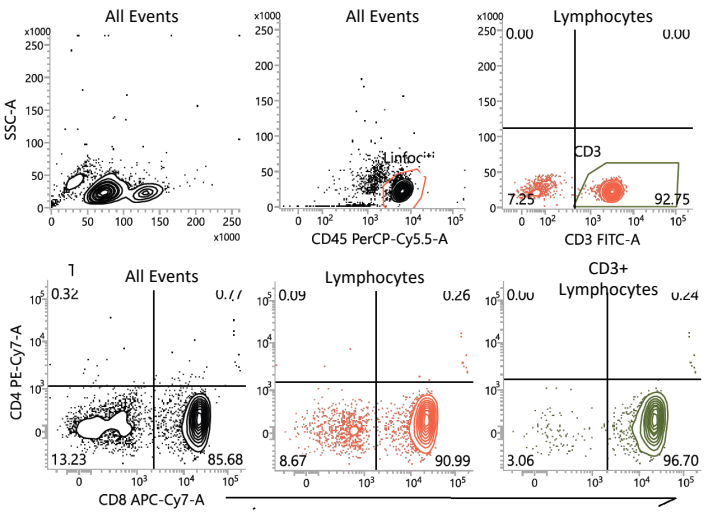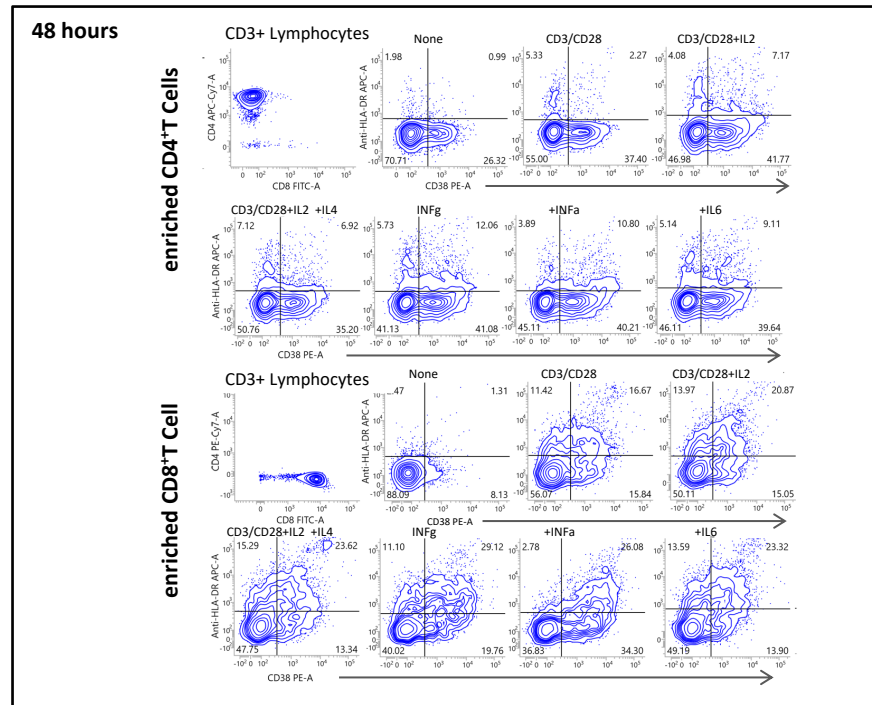

**Figure S1:** Analysis of T cell subpopulations and activated cells at 48h by flow cytometer. CD4<sup>+</sup>, CD8<sup>+</sup> T lymphocytes, and T naïve cells were analyzed by 6 Color TBNK + Truc assay with BD FACSLyric™ flow cytometer. The percentage of activated cells (scatter plots in blue) was measured at 48h with BD Multitest™ CD8/CD38/CD3/HLA-DR and anti-CD4 PE-Cy7 and anti-CD45 V500C.

# PBMC

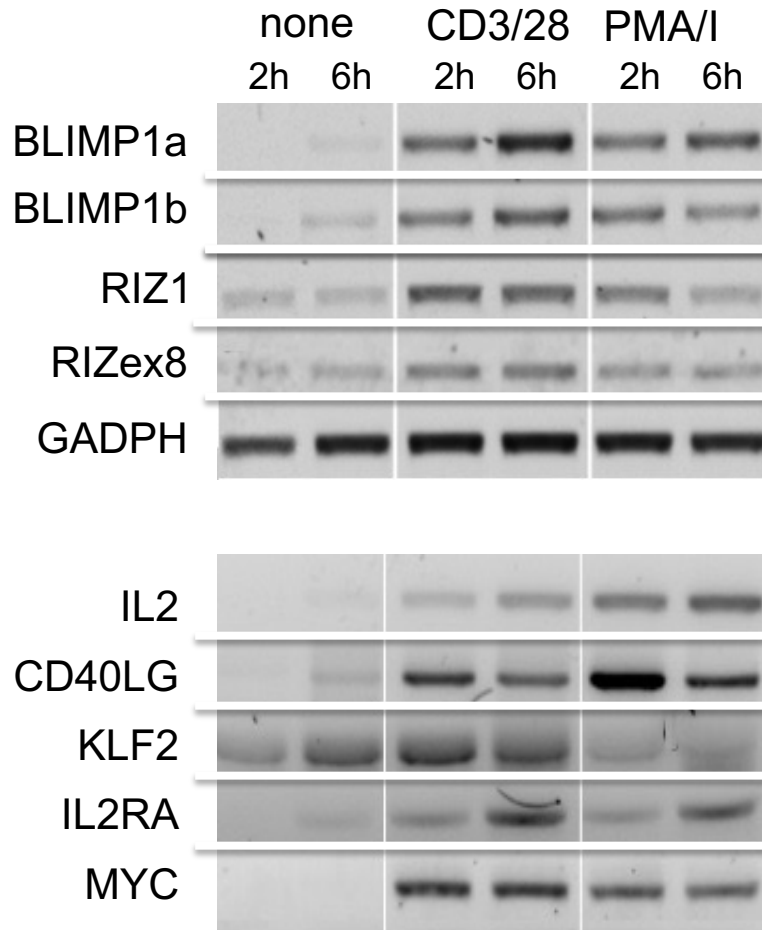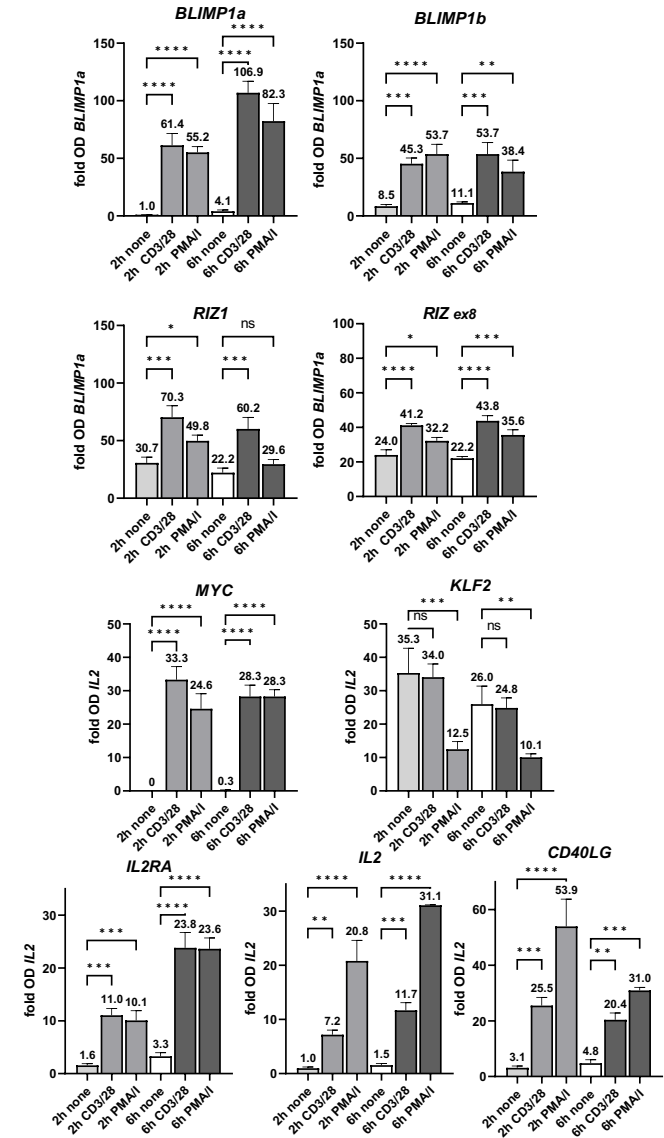

**Figure S2:** Lymphocyte activation increases *PRDM1* and *PRDM2* expression levels. RT-PCR analysis of *PRDM1* and *PRDM2* transcripts upon activation in naïve T cells after stimulation with anti-CD3/CD28 and PMA/Ion for 2h and 6h. Semi-quantitative analysis of genes related to lymphocyte activation is also reported. Bar graphs represent quantitative data obtained by ImageJ analysis of gel electrophoresis images.

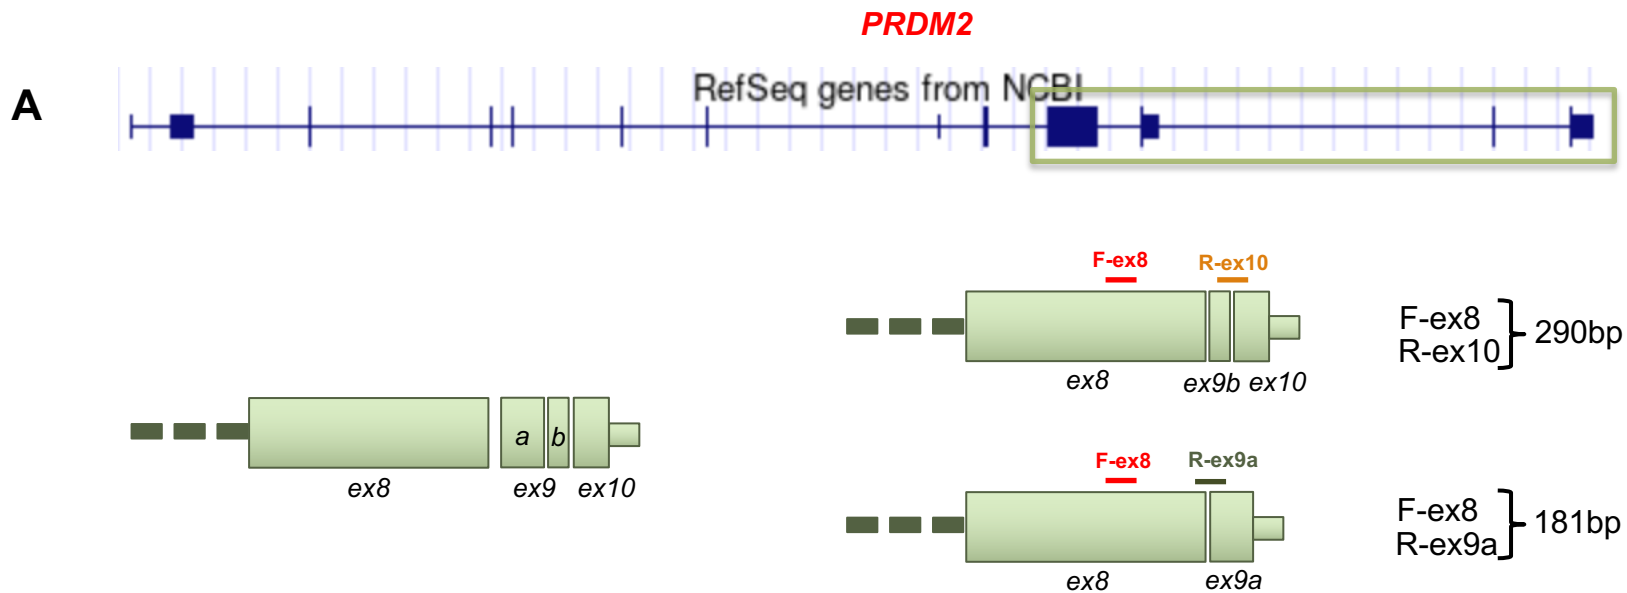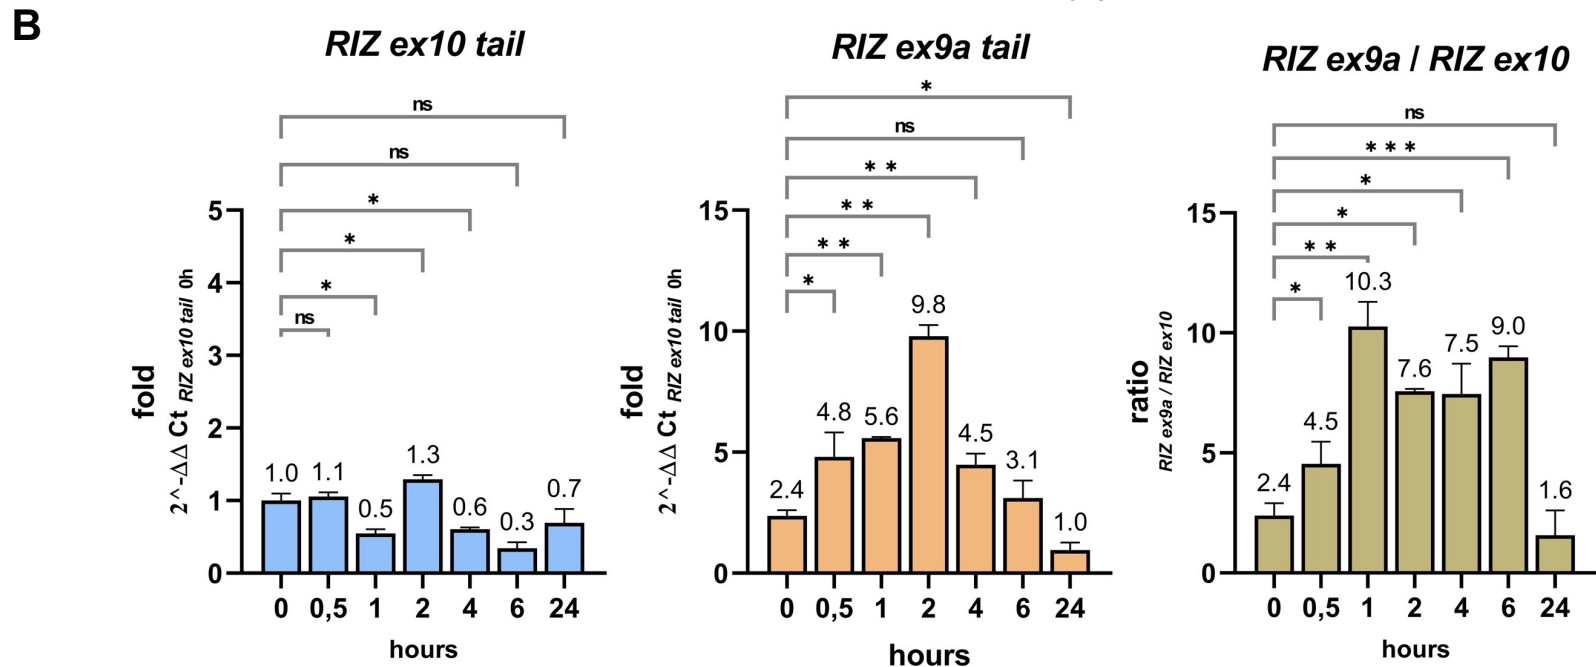

**Figure S3: A.** Schematic presentation of primer localizations for selectively measuring the expression levels of transcript variants with different 3' ends generated by alternative splicing [10]. The use of specific reverse oligonucleotides allowed to distinguish two amplicons with different tails. **B.** Bar graphs represent data from qRT-PCR analysis of *RIZ ex10* amplicon and *RIZ ex9a* amplicon at different time points. Expression levels were calculated using the  $\Delta\Delta Ct$  method with the indicated control gene. The ratio between the *RIZ ex10* and *RIZ ex9a* amplicons was also calculated. Three independent experiments in triplicates were performed and data expressed as mean  $\pm$  SD. ns (not significant), \* $P < 0.05$  vs control cells. \* $p < 0.05$ , \*\* $p < 0.01$ , \*\*\* $p < 0.001$ .

## Jurkat later on transfection

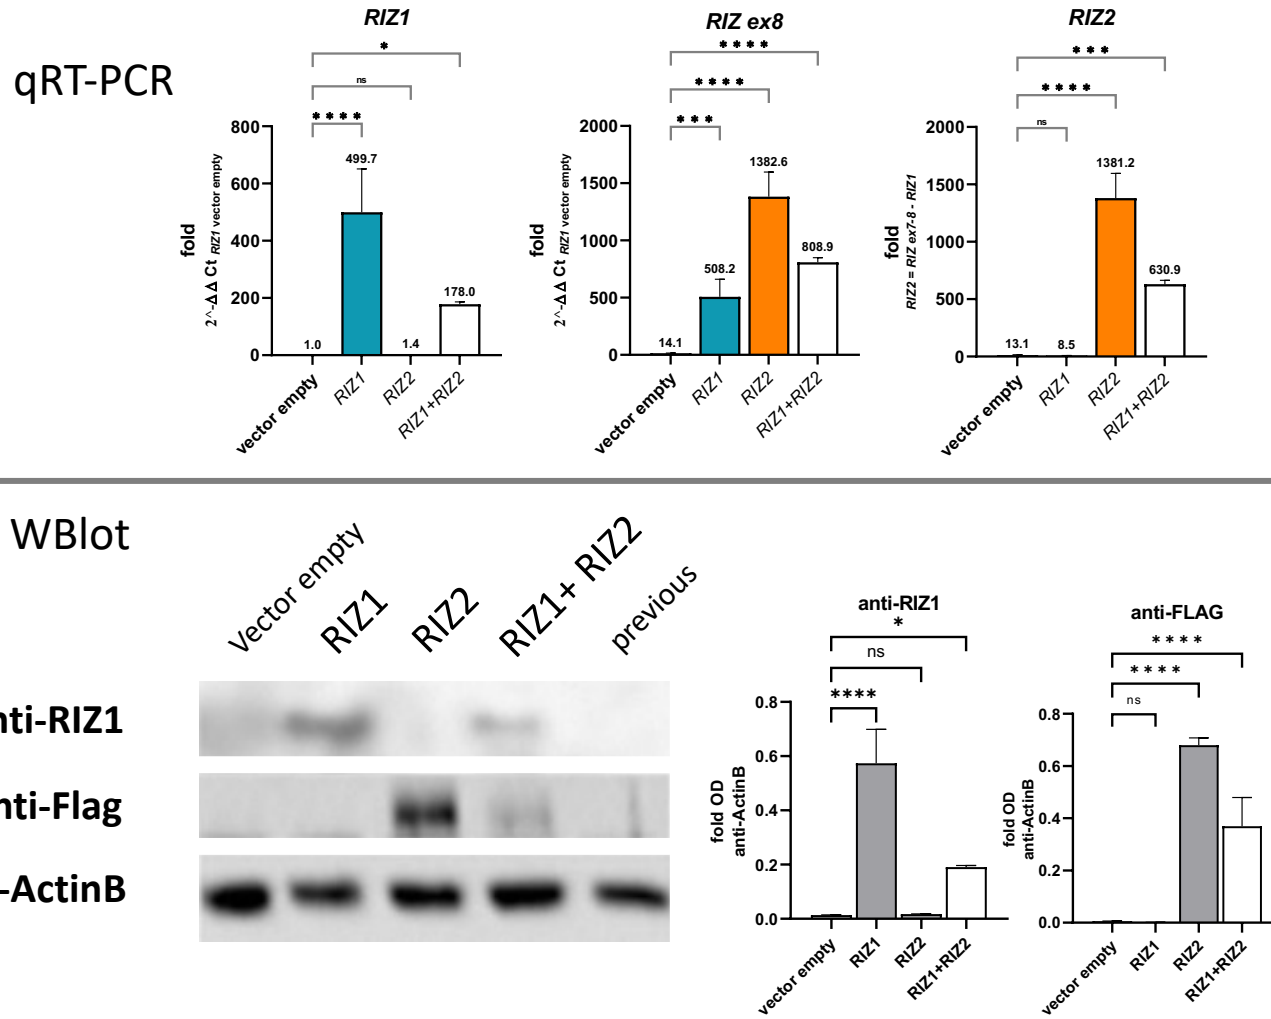

**Figure S4:** *PRDM2* transcript levels in Jurkat cell line. Expression levels of *RIZ1* and *RIZ2* and their proteins in Jurkat cells after transfection with the indicated plasmids through qRT-PCR and Western blot analyses respectively.
